# Supplementary material
Source: PubMed Central journal article supplement (PMC6789238)
Supplement: ajtr0011-5457-f9.pdf [file ajtr0011-5457-f9.pdf]

# FOXD2-AS1 promotes papillary thyroid cancer progression

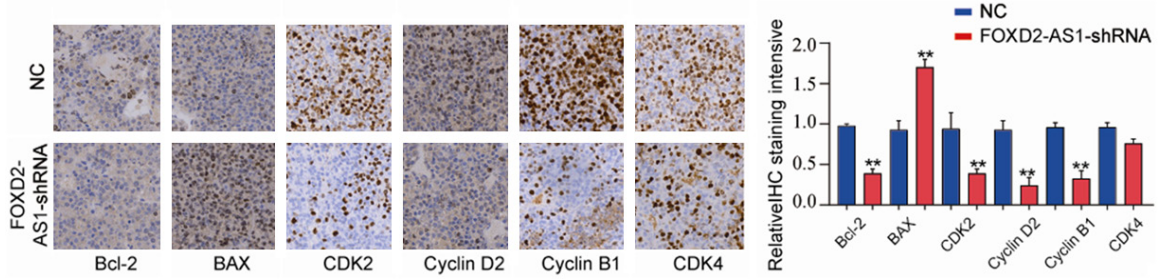

**Supplementary Figure 1.** Immunohistochemistry staining of Bcl2, BAX, CDK2, Cyclin D2, Cyclin B1 and CDK4 in tumor tissues from sh-FOXD2-AS1 or NC group. Data are presented as mean  $\pm$  SD; Student's t-test, \*\* $P < 0.01$ .

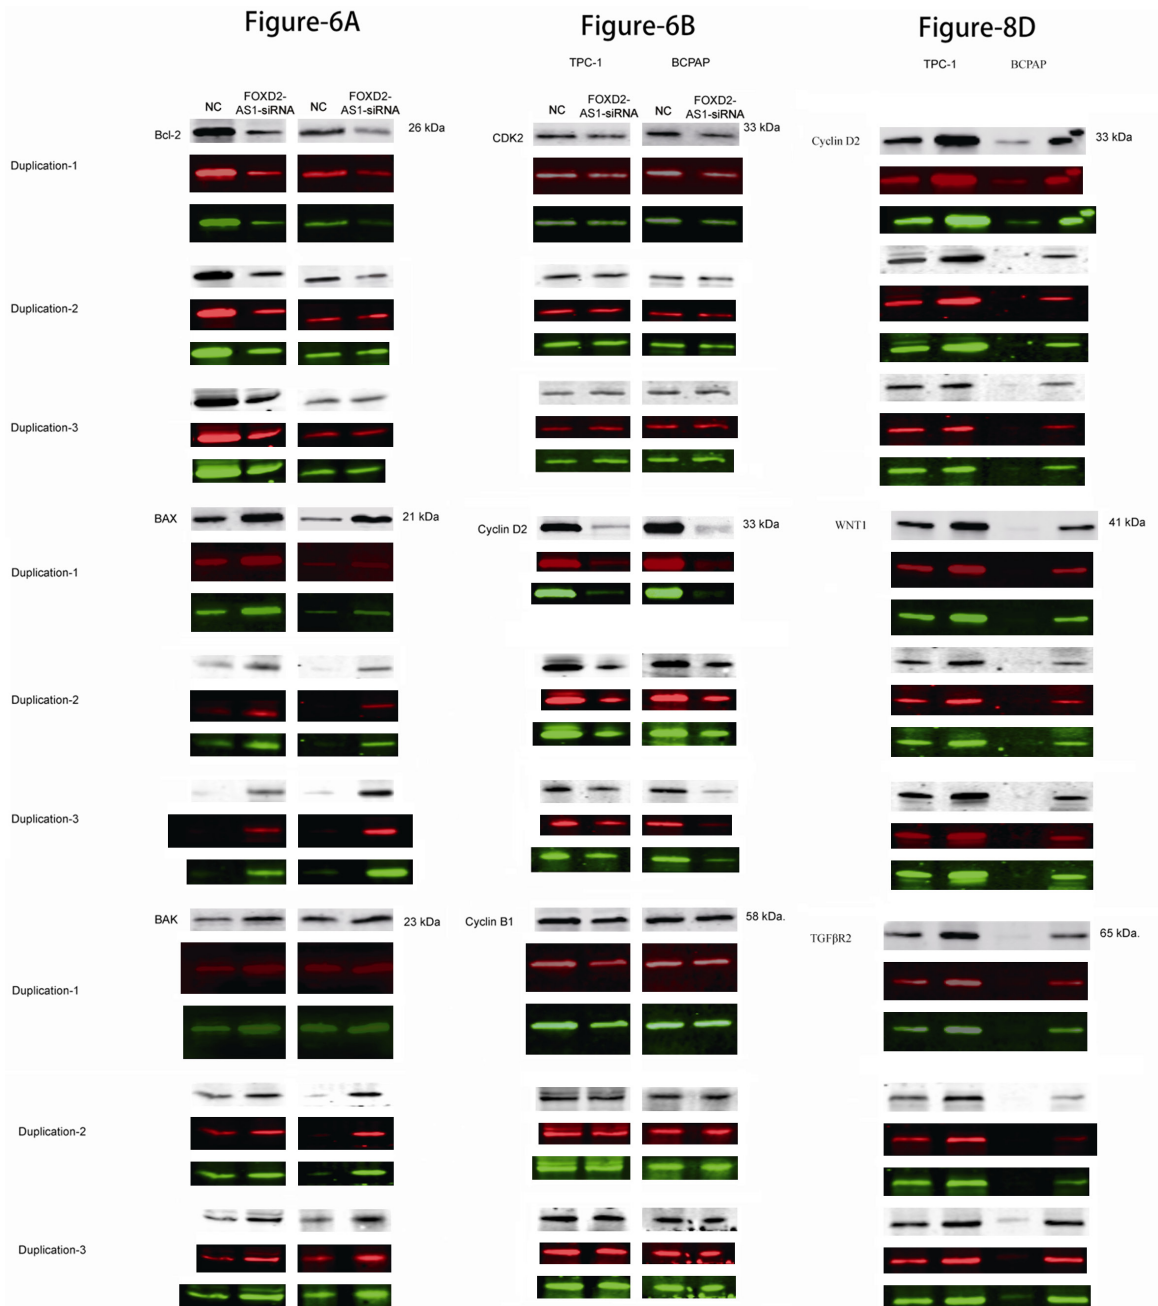

# FOXD2-AS1 promotes papillary thyroid cancer progression

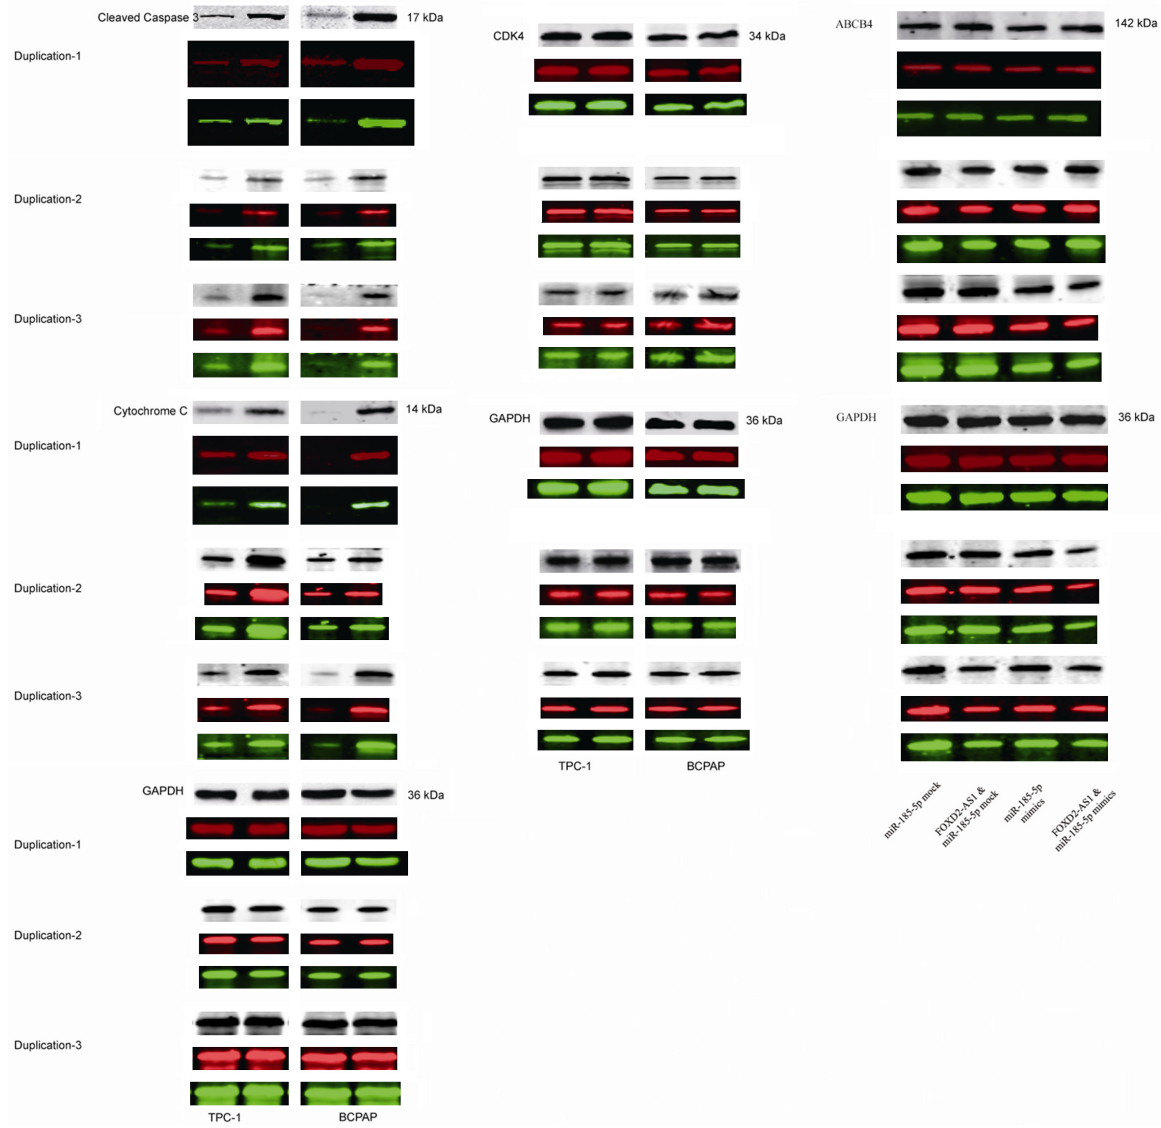

Supplementary Figure 2. Original western blot images for Figures 6A, 6B and 8D.
